# Supplementary material for: The miR-3156-3p/K+ channel axis regulates replication and release of non-enveloped RNA viruses
Source: Research Square preprint supplement (doi:10.21203/rs.3.rs-5609289/v1), 2024-12-18
Supplement: Supplementary file 1 [file 1efc8c88921cd52a2bfcb8dd.pdf]

## Supplementary Data

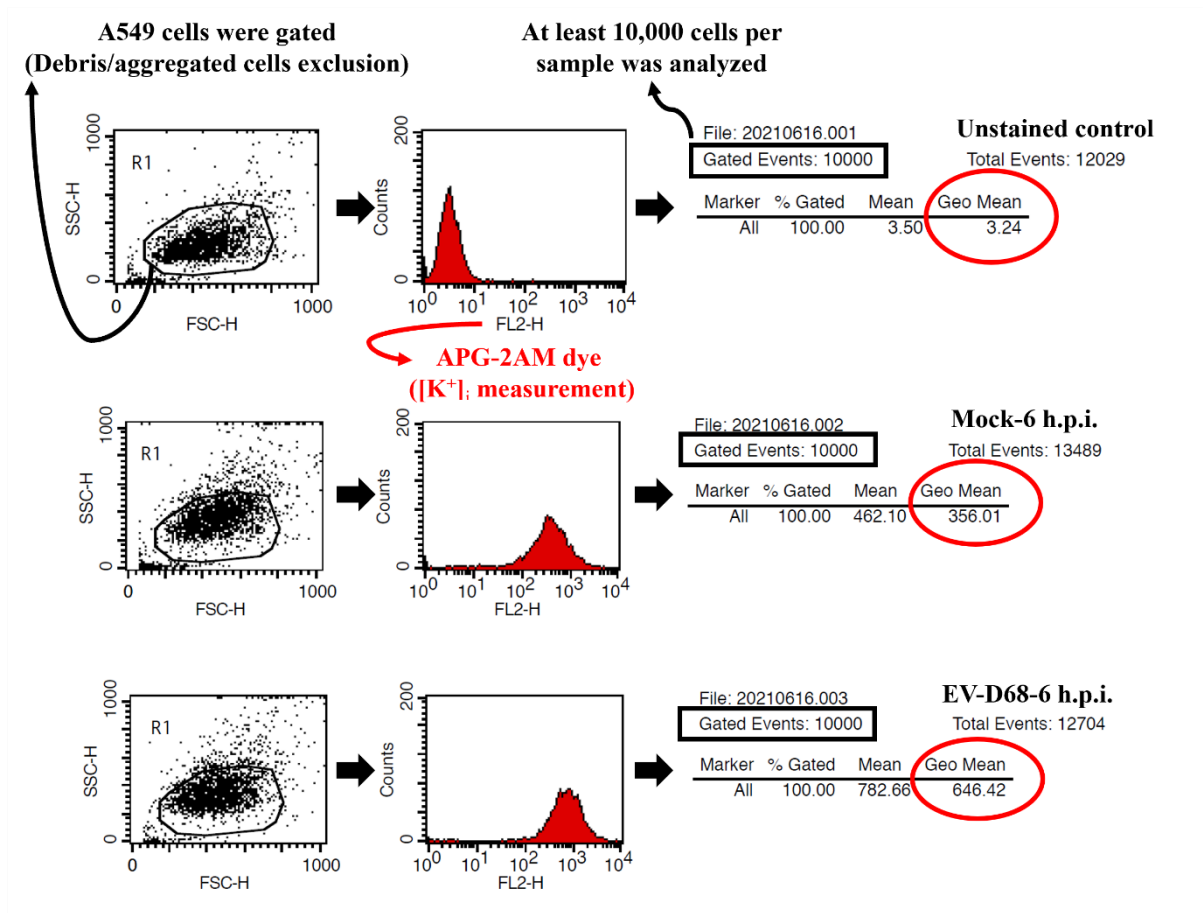

**Supplementary Fig. 1** | Flow cytometry gating strategies illustrated using  $[K^+]_i$  measurement as an example.

Mock- or EV-D68-infected A549 cells at 6 h.p.i., stained with APG-2AM dye, were gated based on forward scatter (FSC) and side scatter (SSC) parameters to exclude debris and aggregated cells. Subsequently, a minimum of 10,000 cells per sample was analyzed, and the geometric mean (Geo Mean) fluorescence was measured using BD CellQuest Pro v5.1 software. Unstained cells (blank) served as a negative control.
